# Supplementary material for: Environmental Conditions along Tuna Larval Dispersion: Insights on the Spawning Habitat and Impact on Their Development Stages
Source: MDPI journal article supplement (doi:10.3390/w14101568), 2022-05-13
Supplement: s1 [file s1]

Archive with 1 entries (1 files):
- water-1684759-supplementary.pdf
